1

2

3

4

5

6

7 **Heat stress reveals high molecular mass proteasomes in *Arabidopsis thaliana***

8 **suspension cells cultures**

9

10

11 Daniel Aristizábal, Viridiana Rivas, Gladys Cassab and Fernando Lledías\*

12

13

14 Departamento de Biología Molecular de Plantas

15 Instituto de Biotecnología, Universidad Nacional Autónoma de México

16 Av. Universidad 2001, Col. Chamilpa, Cuernavaca, Mor., 62250, México.

17

18 \*Corresponding Author

19 [flledias@ibt.unam.mx](mailto:flledias@ibt.unam.mx)

20

21

22

23

24

25

26

27

28

29

30 **Abstract**

31

32           Because of their sessile nature, plants have evolved complex and robust  
33 mechanisms to respond to adverse environments. Stress conditions trigger an increase in  
34 protein turnover and degradation. Proteasomes are essential to the cell for removing, in  
35 a highly regulated manner, partially denatured or oxidized proteins thus minimizing  
36 their cytotoxicity. We observed that suspension cells of *Arabidopsis thaliana* treated  
37 with high temperature (37 °C) directed the assembly of high molecular mass  
38 proteasomes. The removal of a 75% of the original ubiquitin conjugates and the  
39 maintenance of protein carbonyls at basal levels correlated with a specific proteasome  
40 profiles. The profiles obtained by the separation of different proteasomes populations by  
41 Blue-Native Polyacrylamide Gel Electrophoresis and western blot analysis suggest that  
42 synthesis, assembly, and heavy ubiquitination of 20S (CP) subunits are promoted by  
43 heat stress.

44

45 **Keywords:** *Arabidopsis thaliana* suspension cell culture, Proteasome, Heat stress, Blue-  
46 Native gel electrophoresis

47 **Abbreviations:**

48 BN/PAGE    Blue Native Polyacrylamide Gel Electrophoresis

49 SDS/PAGE   SDS Polyacrylamide Gel Electrophoresis

50

51        **1. Introduction**

52

53            Plants undergo various stressful environments across their lifetimes, but their  
54 sessile nature means they cannot escape from unfavorable conditions. Plants have  
55 developed unique strategies for stress mitigation or adaptation to their surroundings.  
56 Since stress environments activate an increase in protein turnover and degradation, one  
57 strategy to cope with it is the selective protein breakdown mediated by the proteasome  
58 in the nucleus, cytosol and endoplasmic, reticulum which decreased their toxicity  
59 (Smalle and Vierstra, 2004), (Thompson and Vierstra, 2005). From *in vitro* studies, it  
60 was shown that the 20S proteasome actively recognizes and degrades oxidized proteins,  
61 in contrast to the 26S proteasome, which is not very effective even in the presence of  
62 ATP and the ubiquitination system (Shang and Taylor, 1995), (Obin et al.,1998). This  
63 may be explained by the fact that a mild oxidative stress rapidly inactivates both the  
64 ubiquitin-activating-conjugating system and 26S proteasome activity in intact cells but  
65 does not affect 20S proteasome activity (Davies, 2001).

66            Proteasomes are protein degradative complexes involved in all processes of the  
67 living cell such as cell division, stress response, transcription, DNA repair, and signal  
68 transduction, among others (Glickman and Ciechanover, 2002; Hershko and  
69 Ciechanover, 1998). In plants, proteasomes have been particularly involved in the  
70 differentiation of leaves, flowers, and xylem, in hormone response, as well as abiotic  
71 and biotic stress responses (Shibahara et al., 2002). Proteomic analysis of different  
72 organism reported that an estimated 80 to 90% of the cytosolic proteins are degraded via  
73 proteasomes (Glickman and Ciechanover, 2002). The minimal expression of a  
74 proteasome is the 20S core particle, or catalytic particle (CP) constituted by four stacked  
75 seven-membered rings of  $\beta_{1-7}$  (central) and  $\alpha_{1-7}$  (distal) subunits in an arrangement  $\alpha$ -

76  $\beta$ - $\beta$ - $\alpha$ , for a total of 28 subunits. In this hollow-cylinder structure, the interior domains  
77 of the subunits  $\beta$ 1,  $\beta$ 2 and  $\beta$ 5 define catalytic domains that have trypsin, chymotrypsin,  
78 and caspase-like activities respectively (Kish-Trier and Hill, 2013). Virtually any  
79 protein in direct contact with the proteasome catalytic sites could be degraded  
80 (Nussbaum et al., 1998). The first line of proteasome regulation, that limits the  
81 inappropriate and non-selective protein degradation, are the N-terminus regions of  
82  $\alpha$  subunits that constitute the proteasome gate (Groll et al., 2000). This basic 20S (CP)  
83 proteasome version is responsible for cell removal of oxidatively modified proteins  
84 (Davies, 2001). The function and structure of the 20S (CP) is highly conserved through  
85 eukarya (Tanaka et al., 1988; Fort et al., 2015). 20S  $\alpha$  subunits are also the binding sites  
86 for different regulatory complexes. The 26S proteasome for example, is formed by the  
87 basic 20S (CP) flanked by one or two 19S regulatory complexes (19S-20S or 19S-20S-  
88 19S) docked on the distal-most surfaces of the  $\alpha$  rings. For *Saccharomyces cerevisiae*,  
89 *Schizosaccharomyces pombe* and human cells, the architecture of the 19S regulatory  
90 particle has been reported at sub-nanometer level and the functions of most of the  
91 subunits has been assigned (Beck et al., 2012; Schweitze et al., 2016; Sakata et al.,  
92 2012; Bohn et al., 2010). As for the independent 20S (CP), the structure and function of  
93 the 19S regulatory complex is conserved through evolution (Fort et al., 2015). The 19S  
94 complex is in charge of recognizing ubiquitinated proteins, denature them by the action  
95 of ATP-dependent “unfoldases”, opens the 20S (CP) gate by rearrangement of the  $\alpha$   
96 subunits, and translocate the protein substrate to the catalytic sites for its degradation  
97 (Peth et al., 2010). The 26S is the specialized proteasome version involved -along with a  
98 ubiquitin activating (E1), the ubiquitin conjugating (E2) and the ubiquitin ligases (E3)  
99 enzymes- in the Ubiquitin-Proteasome-System (UPS) (Hershko and Ciechanover,  
100 1998). Approximately 5% of the *A. thaliana* proteome is dedicated to this system or its

101 regulation (Manzano et al., 2008). A different proteasome regulatory particle PA28  
102 (11S, REG), is a trimeric complex that degrades carbonylated proteins in an ATP  
103 independent manner (Hernebring et al., 2013). PA200 (in mammals) and the  
104 homologous Blm10 (in yeast), are alternative regulatory complexes which had been  
105 involved in the degradation of very specific non-ubiquitinated protein substrates (López  
106 et al., 2011; Blickwedehl et al., 2012). Ecm29 (in a human cell line) has been proposed  
107 to act as a structural stabilizing agent for the 26S proteasome, especially when the 20S  
108 (CP) maturation was impaired (Lehmann et al., 2010). Information on different  
109 proteasome regulators published so far has shown that the binding of the regulatory  
110 complexes has a deep influence in the selection of substrates, in the catalytic function of  
111 the 20S (CP) and in the peptides produced. In this scenario, the presence of “supra-20S”  
112 complexes allow the cell to respond to very specific metabolic stages. The active  
113 building of proteasomal complexes has a counterpart, the 26S proteasomes in yeast  
114 were disarmed into independent 19S and 20S (CP) particles during the stationary phase  
115 and this phenomenon correlated with cell viability. When ATP was available by  
116 medium refreshing, the 26S proteasomes were reconstituted (Bajorek et al., 2003).  
117 Dissociation and reassociation of the 26S proteasome have been reported during the  
118 adaptation of a human cell line to oxidative stress (Grune et al., 2011). Reversible 26S  
119 disassembly has been reported upon mitochondrial stress in yeast (Livnat-Levanon et  
120 al., 2014). Considering the assembly/disassembly capacities of the proteasomes and the  
121 repertoire of regulatory complexes, any cell in a specific environmental context, have  
122 the possibilities to “direct” the versions of the proteasome that respond better to the  
123 catalytic needs of the moment, and the proteasome versions selected would have an  
124 influence on cell fate. This information indicates that a very dynamic process of

125 assembly, selection of regulatory particles, and disassembly of proteasomes are  
126 continuously taking place in cells in close relationship with the environment.  
127 Great efforts have been made to characterize biochemically, genetically and by mixed  
128 “omics” techniques, the subunit composition and function of the proteasomes in plants.  
129 In *A. thaliana* particularly, their 20S (CP) and 26S proteasomes have been isolated and  
130 characterized (Polge et al., 2009; Yang et al., 2004; Book et al., 2010). Unique genes  
131 code for the 20S (CP) and the 19S subunits in yeast and mammalian cells, in *A. thaliana*  
132 instead, both complexes are encoded by gene pairs whose sequence differences, suggest  
133 protein products with altered functions (Yang et al., 2004), so potentially different 20S  
134 (CP), 26S particles and probably other proteasomes entities assembled with paralogous  
135 pairs coexist. By proteomic approach using an epitope-tagged 26S proteasomes as bait,  
136 more than 40 proteins interact with this complex. This in-depth mass spectrometric  
137 analysis strongly suggests the existence of a diverse array of proteasomes. Despite all  
138 the information on *A. thaliana* proteasomes, studies on the dynamics of the different  
139 proteasome versions in plants as has been reported for yeast (Bajorek et al., 2003;  
140 Livnat-Levanon et al., 2014) or mammalian cells (Grune et al., 2011; 34. Shibatani et  
141 al., 2006) are limited.

142 Blue Native Polyacrylamide Gel Electrophoresis (BN/PAGE) is a technique that  
143 allows the separation of native protein complexes based on their molecular mass  
144 differences (Wittig et al., 2006). BN/PAGE has been used for the complexomics  
145 analysis of different models (Wittig et al., 2006; Lasserre et al., 2006; Hashemi et al.,  
146 2016). This technique has been employed to successfully separate the different versions  
147 of proteasomes in whole cell lysates of a human embryonic cell line (HEK293)  
148 (Camacho-Carvajal et al., 2004) and to study the proteasome dynamics of rabbit  
149 reticulocytes (Shibatani et al., 2006). In the latter report, six native proteasome

150 populations (20S, 20S-PA28, PA28-20S-PA28, 19S-20S-PA28, 19S-20S and 19S-20S-  
151 19S) were identified. By  $\gamma$ -interferon stimulation or the chemical inhibition of the  
152 proteasome, an active interchange of proteasome regulatory “caps” was evidenced  
153 (Shibatani et al., 2006). The applicability of BN/PAGE in combination with label-free  
154 protein quantification and protein correlation profiling was employed to investigate the  
155 20S proteasome from *Plasmodium falciparum*, even in the background of the whole  
156 protein extract (Sessler et al., 2012). BN/PAGE was used for monitoring changes in the  
157 quantity and subunit composition of the 20S (CP) when the  $\alpha 3$  subunit was deleted in  
158 yeast (Couttas et al., 2011).

159         In the present work, we adapted some of the above-mentioned protocols of  
160 proteasome isolation and analysis by BN/PAGE to establish whether in *A. thaliana* cells  
161 in suspension culture different proteasome versions coexist and if under drastic changes  
162 in the culture conditions like heat stress, the basal proteasome populations were altered.  
163 Our results showed that cells in suspension culture subjected to an increment of  
164 temperature (from 25 to 37° C) experienced an enrichment of high molecular mass  
165 proteasomes that in turn have an impact on the cell content of oxidized and  
166 ubiquitinated proteins.

167

## 170 **2. Methods**

171

### 172 **2.1 Cell culture and heat stress treatment**

173

174 Suspension cell cultures were generated from hypocotyls dissected from *A. thaliana*  
175 seedlings and were kindly provided by P. Guzmán and L. Aguilar (CINVESTAV,  
176 Irapuato). Cells were maintained by weekly transfer in MS medium (Murashige and

177 Skoog, 1962) containing basal salt mixture, 3% sucrose and supplemented with 50  $\mu\text{g}$   
178 /L kinetin, 75  $\mu\text{g/L}$  2,4-diclorofenoxiacetic acid (2-4D) and 1X Gamborg's vitamin  
179 solution, pH 5.7. Cultures were incubated at 25 °C and 100 rpm under long day  
180 conditions of 16 h light/ 8 h dark, and 80  $\mu\text{M}$  photons  $\text{m}^{-2} \text{s}^{-1}$ . For heat stress treatment,  
181 a one-week "mother culture" of exponentially growing cells was diluted (1:10) with  
182 fresh MS medium (plus supplements) and divided into independent 250 mL flasks  
183 containing 50 mL liquid medium. Cell cultures were incubated at 37 °C at 100 rpm for  
184 0.5, 1, 2 and 3 h (illuminated), then individual cultures were immediately filtered using  
185 regular paper towels to discard liquid medium. Cell packages (approximately 10 mL)  
186 were recovered with a spatula and immediately frozen in liquid nitrogen. Samples were  
187 kept at -70 °C until their processing for proteasome isolation.

188

## 189 **2.2 Proteasomes isolation**

190

191 Total cell lysate was obtained by adding to each frozen cell package, 25 mL of  
192 extraction buffer (Tris-HCl pH 7.5, 1 mM dithiothreitol, 2 mM adenosine triphosphate,  
193 0.25M sucrose, 1 mM  $\text{MgCl}_2$ , 1% polyvinylpyrrolidone, Complete EDTA-free  
194 [Roche, used as recommended]), and "10 mL" of glass beads (4 mm). While thawing,  
195 cells were disrupted by five vortex cycles (5 min vortexing followed by 5 min  
196 incubation in ice). At this stage, aliquots from different cultures were taken for the  
197 determination of the total content of ubiquitin conjugates and protein carbonyls by  
198 western blot (see below). Total lysate was filtered on three layers of cheesecloth to  
199 retire glass beads and was centrifuged at 16 000 X g for 15 min at 4 °C. Pellet (P1,  
200 Fig. 1) was eliminated and supernatant (Sn1, Fig. 1) was centrifuged for 1h at 70 000 X  
201 g at 4 °C. Resultant pellet (P2, Fig. 1) was discarded and supernatant (Sn2, Fig. 1) was



202 centrifuged again, this time at 350 000 X g for 3.5 h at 4 °C. The supernatant (Sn3, Fig.  
203 1) was discarded, the pellet (P3, Fig.1) which contained the proteasomes enriched  
204 fraction, was resuspended in buffer A (HEPES buffer pH 7.8, 75 mM NaCl, 375 mM  
205 MgCl<sub>2</sub>, 40 mM DTT, glycerol 7.5% y 1.6 μM ATP). Aliquots were immediately  
206 separated by BN-PAGE or kept at -70 °C until their analysis.

207

### 208 **2.3 BN/PAGE**

209

210 Resolution of proteasomes according to their molecular mass was achieved by  
211 BN/PAGE (Wittig et al., 2006), and optimized for proteasome analysis (Camacho-  
212 Carvajal et al., 2004; Shibatani et al., 2006) with some modifications. Proteasomes  
213 enriched fraction in buffer A was directly loaded onto an 8 X 6 cm BN/PAGE mini  
214 gels (5 to 10% acrylamide gradient [acrylamide:bis-acrylamide 32:1] in 50 mM  
215 BisTris/HCl, pH 7.0, 500 mM α-aminocaproic acid, and overlaid by 4% stacking gel in  
216 the same buffer). Electrophoresis was carried out at 5 °C according to the program: 50  
217 V for 1h, 150 V for 16h and 500 V for 1h. Cathode buffer: 50 mM Tricine, 15 mM  
218 BisTris-HCl pH 7.0 and 0.02% Coomassie G-250 (Cat. 1442C-1, Research Organics,  
219 Inc.), anode buffer: 50 mM Bis-Tris-HCl pH 7.0 in a Mini-PROTEAN System (Bio-  
220 Rad). Proteins in analytical BN/PAGE were visualized with Coomassie Brilliant Blue  
221 (section 2.5) or by silver stain [40] (Blum et al., 1986). For preparative purposes,  
222 BN/PAGE gels were fractionated and electroeluted (next section). The molecular mass  
223 of the protein complexes was estimated by the method of Wittig et al., 2010, using the  
224 endogenous HSP 60, Rubisco (both proteins identified by mass spectrometry in the  
225 fraction 4 and 7 respectively), and the independent 20S (CP) native complexes as  
226 molecular mass markers.

227

## 228 **2.4 Protein electroelution and concentration**

229

230 After electrophoresis running completion, a glass plate of the gel “sandwich” was  
231 removed. As the cathode buffer contained Coomassie G-250, four protein bands were  
232 stained during electrophoresis (Fig. 2b) and used as markers to cut the gels into eight  
233 horizontal fractions (Fig. 2c). For the analysis of the disassembled proteasomes  
234 components by western blot, each fraction was individually divided into smaller  
235 fragments (~ 2 X 2 mm) and heated at 95 °C for 10 min in the presence of 1 mL of 1X  
236 Laemmli sample buffer (Tris 50 mM pH 6.8, 2% SDS, 5% β-ME, 8% glycerol without  
237 bromophenol blue). After cooling, gel pieces and sample buffer were transferred to the  
238 sample traps of the electroelutor/concentrator system “Little Blue Tank” (ISCO, INC)  
239 containing 10 mL of Laemmli running buffer (25 mM Tris, 192 mM glycine, 0.1%  
240 SDS) at a 1:10 dilution. Laemmli running (1X) buffer was used in both electrode  
241 compartments. Protein electroelution was carried out at 3 W for 3 h at 5 °C. Samples  
242 recovered from the sample traps (~ 200 μL) were precipitated by methanol/chloroform,  
243 air dried, resuspended and heated at 95 °C for 10 min in 1X Laemmli sample buffer for  
244 their SDS/PAGE and western blot analysis. A similar technique was followed to recover  
245 native proteasome complexes from BN/PAGE, except that gel fractions were not heated  
246 or incubated in the presence of chaotropic agents. For this purpose,  
247 electroelutor/concentrator sample traps contained 10 mL of running buffer (1:10) and  
248 1X running buffer was used in electrode compartments (without SDS). Samples  
249 recovered were immediately loaded or preserved at -70 °C after glycerol addition (20%  
250 final) for additional BN/PAGE analysis.

251

## 252 **2.5 SDS/PAGE**

253

254 We analyzed the protein profile of each electroeluted sample by SDS/PAGE according to  
255 the protocol of Laemmli, 1970. Samples in sample buffer were loaded onto 4% stacking  
256 gels and resolved in 12% polyacrylamide-SDS gels. Runs were performed using the  
257 Tris/glycine/SDS running buffer (see previous section) at 200 V for 1h at 5 °C in a Mini-  
258 PROTEAN system (Bio-Rad). Gels were stained in a solution of Coomassie Brilliant  
259 Blue R-250 (0.1%), acetic acid (40%) and ethanol (40%). For silver staining of proteins  
260 on BN/PAGE, we used the improved method of Blum et al., 1986. [41]. We employed  
261 Pink pre-stained ladder, 15-175 kDa (Cat. MWP02, Nippon Genetics) as molecular  
262 weight markers.

263

## 264 **2.6 Western blot and slot blot analysis**

265

266 Proteins separated by BN/PAGE or SDS/PAGE were electrophoretically transferred to  
267 nitrocellulose membranes (0.45 µM HATF, Millipore) using transfer buffer (25 mM  
268 Tris, 192 mM glycine, 20% isopropanol) in a Mini-PROTEAN (Bio-Rad) transfer  
269 system at 360 mA for 1h at 6 °C. Proteins on BN/PAGE were denatured previous to  
270 their blotting by incubating the gel in a solution of 20mM Tris-HCl buffer (pH 7.4), 3%  
271 SDS for 10 min with agitation followed by heating in a microwave oven (medium level  
272 for 1 min). After an additional incubation for 10 min at room temperature, proteins were  
273 transferred as indicated. Proteins on membranes were fixed (25% isopropanol, 10%  
274 acetic acid) for 1h with agitation at room temperature. After distilled water wash,  
275 proteins were visualized with Ponceau S solution (0.2% Ponceau S in 5% acetic acid).  
276 For western blot assay, membranes were blocked 1h at 25 °C with 5% non-fat milk in

277 TBS-T buffer (20mM Tris-HCl pH7.4, 150mM NaCl, 0.05% Tween-20) and incubated  
278 with primary or secondary antibodies in the solution of non-fat milk in TBS-T buffer.  
279 All intermediate washes were done with TBS-T. The following primary antibodies were  
280 used at the same 1:10 000 dilutions for 2 h at 25 °C: mouse-anti-proteasome 20S  
281 alpha+beta (Cat. ab22673, Abcam), rabbit-anti-proteasome 26S S2 (Rpn1) (Cat.  
282 ab98865, Abcam), rabbit-anti-proteasome Rpn6 (S9) (Cat. PW8370, Enzo), mouse-anti-  
283 Rpt2 (Cat. ab21882, Abcam), rabbit-anti-19S S5A/Rpn10 (Cat. ab56851, Abcam) and  
284 rabbit-anti-Ubiquitin antibody (Cat. sc-9133, Santa Cruz Biotechnology, Inc.). As  
285 secondary antibodies, we employed HRP-goat-anti-mouse IgG (H+L) (Cat. 62-6520,  
286 Zymed) or HRP-goat-anti-rabbit IgG (H+L) (Cat. 65-6120, Zymed) both at 1:10 000  
287 dilutions for 1 h at 25 °C. Western blots were developed with Super Signal West Femto  
288 (Cat. 34095, Thermo Scientific) and exposed to X-Ray films (Cat. 6040331, Kodak).  
289 Total carbonyl (Johansson et al., 2004) and ubiquitin conjugates (Tang et al., 2014)  
290 contents of heat stress and control samples, were estimated by slot blot analysis. For  
291 carbonyl content estimation, protein from total cell lysates (section 2.2) was precipitated  
292 with methanol/chloroform and resuspended in 1X Laemmli sample buffer. Five  
293 milligrams of each sample (determined by the method of Lowry, 1951 [44]) were  
294 derivatized with 2,4-dinitrophenylhydrazine (DNPH) and loaded on each well of the  
295 slot blot manifold (Cat. PR 648, Hoefer). Oxidatively modified proteins on  
296 nitrocellulose filters were determined by an immunochemical protocol (OxyBlot Protein  
297 Oxidation detection kit, from Chemicon International). Same slot blot technique was  
298 followed to determine ubiquitin conjugates, but samples were not derivatized.  
299 Quantification of western and slot blots was made by densitometry of the  
300 autoradiograms using NIH ImageJ 1.48 software. All data were standardized for growth  
301 in control conditions (wild type = 1).

302

### 303 **2.7 Protein quantification by a modified Lowry method**

304

305 We determined protein content in those samples that contained  $\beta$ -ME, by the Lowry  
306 method according to the modification of Makkar *et al.*, 1980. Briefly, an aliquot of each  
307 sample was vacuum dried to eliminate  $\beta$ -ME (from Laemmli sample buffer), which  
308 interferes with the protein determination. Samples were resuspended with 0.1N NaOH  
309 for its protein quantification by the classic Lowry method with Folin-Ciocalteu reagent  
310 calibrated with crystalline bovine serum albumin.

311

### 312 **2.8 Mass spectrometry**

313

314 For the mass spectrometric analysis, BN/PAGE slices were destained and chemically  
315 modified prior to mass spectrometry analysis. After reduction (dithiothreitol) an  
316 alkylation (iodoacetamide) samples were digested in-gel with trypsin (Promega,  
317 Madison, WI, USA). Resultant peptides were desalted with Zip Tips C18 (Millipore-  
318 Billerica, MA, USA) and applied to a LC-MS system (Liquid Chromatography-Mass  
319 Spectrometry) composed by a nanoflow pump (EASY-nLC II, Thermo-Fisher Co. San  
320 Jose, CA) and a LTQ-Orbitrap Velos (Thermo-Fisher Co., San Jose, CA) mass  
321 spectrometer with a nano-electrospray ionization (ESI) source. The mass spectrometer  
322 was calibrated with a Calmix solution containing N-butylamine, caffeine, Met-Arg-Phe-  
323 Ala (MRFA), and Ultramark 1621. For LC, a 10%–80% gradient of solution B  
324 (water/acetonitrile 0.1% formic acid) was used during 120 min through a home-made  
325 capillary column (0.75  $\mu$ m in diameter  $\times$  10 cm in length; RP-C18) with a flux of 300  
326 nL/min. Collision-Induced Dissociation (CID) and High-energy Collision Dissociation

327 (HCD) methods were used for peptide fragmentation, selecting only 2+, 3+ and 4+  
328 charged ions. Single charged ions and those above 5+, as well as ions with undefined  
329 charges, were not considered. For data acquisition, a positive ion mode was set. Capture  
330 and performance of fragmentation data were done according to the total ion scanning  
331 and predetermined charge with 3.0 (m/z) isolation width, a collision energy of 35  
332 arbitrary units, an activation Q of 0.250, an activation time of 10 milliseconds and a  
333 maximum injection time of 10 milliseconds per micro-scanning. The automatic capture  
334 of data was done using ion dynamic exclusion: (i) exclusion list of 400 ions; (ii) pre-  
335 exclusion time of 30 s; and (iii) exclusion time of 300 s. Data were searched against an  
336 available *A. thaliana* NCBI databases using Discoverer 1.4 software (Thermo-Fisher  
337 Co., San Jose, CA, USA).

338

### 339 **2.9 Cell viability test**

340

341 To determine cell viability, samples were collected from the stressed cell cultures at 30  
342 min, 1, 2 and 3 h and from unexposed cells at 0 h and 3 h. For all cultures viability was  
343 also quantified after 3 h recovery at 25 °C. 100 µL of cell culture was mixed with one  
344 volume of 0.4 % trypan blue (Sigma-Aldrich) and were incubated for 3 min at 25 °C.  
345 Viable (unstained) and dead (stained) cells were counted in a Neubauer chamber under  
346 a light microscope. Cell viability was considered as the percentage of unstained cells  
347 out of the total of cells observed.

348

349

350

351

352 **3. Results**

353

354 **3.1 Proteasome isolation**

355

356 The isolation of proteasomes by a protocol of differential centrifugation has been  
357 published (Shibatani et al., 2006). This technique has proven effective in capturing all  
358 the possible proteasome versions present in a reticulocyte model. We adapted this  
359 protocol to isolate the different proteasome versions in suspension cells cultures of *A.*  
360 *thaliana*. The analysis by SDS/PAGE and western blot of representative aliquots  
361 (pellets and supernatants) collected along the isolation protocol revealed that the final  
362 pellet was effectively enriched in proteasomes (P3, Fig 1b). An enrichment factor  
363 (P3/Sn1) of 22.5 X was estimated by film densitometry of a western blot using an anti-  
364 20S proteasome.

365

366 **3.2 Separation of different proteasome versions of *A. thaliana* cells by BN/PAGE,  
367 concentration by electroelution and protein blot analysis.**

368

369 Since potentially different proteasome versions were contained in the crude P3 fraction  
370 from *A. thaliana* cells (Fig. 1b), we loaded this sample directly onto the stacking well of  
371 a BN/PAGE for their separation, transfer and detection by western blot with an anti-20S  
372 antibody. A Coomassie-stained lateral strip from a BN/PAGE, revealed a profile of four  
373 major bands of a molecular mass (estimated by the method described by Wittig *et al.*  
374 *2006*) of 560, 750, 850 and 2600 kDa (Fig. 2b). Western blot from transferred native  
375 gels shown that only one of these bands with a molecular mass of ~ 750 kDa, had a  
376 strong reactivity with the anti-20S antibody (Fig. 2a). The migration of this band was

377 consistent with the native molecular mass of the independent 20S (CP) by BN/PAGE  
378 (Shibatani et al., 2006; Camacho-Carvajal et al., 2004). Nevertheless, our western blot  
379 analysis failed at showing proteasome complexes of a molecular mass higher than the  
380 20S (CP) (Fig. 2a). One possibility to explain this result might be the low abundance of  
381 superior proteasomes versions or the limitation of our detection system. To circumvent  
382 this problem, we cut an entire mini BN/PAGE (8 X 6 cm) into eight horizontal fractions  
383 that were independently electroeluted and analyzed (Fig. 2c). One of the major  
384 advantages of electroelution in the system we used, in addition to its quantitative sample  
385 recovery (Ohhashi et al., 1991; Sui et al., 1996), is that it concentrates the contained  
386 proteins. For the protocol here described, we estimated a concentration factor of 35X.  
387 The components of disassembled and electroeluted proteasomes in every gel piece  
388 (section 2.4) were resolved by SDS/PAGE and analyzed by western blot using the anti-  
389 20S antibody. Figure 2d shows a representative profile of the proteins recovered from a  
390 whole BN/PAGE and immobilized on a nitrocellulose filter. Ponceau S stain evidenced  
391 an abundant set of bands between 20 and 30 kDa (lane 5, Fig. 2d) electroeluted from the  
392 fraction 5 that contained the band originally recognized by the anti-20S antibody when  
393 an intact native gel was transferred (Fig. 2a). The analysis of an equivalent gel fraction  
394 by mass spectrometry (Supplemental Table 1) indicated that this band corresponded to  
395 the independent 20S (CP). Additional evidence that proteins in fraction 5 corresponded  
396 to the 20S (CP) subunits, was given by the anti-20S antibody (Fig. 2e and f). A longer  
397 film exposure to the same western blot membrane (Fig. 2f) produced a heavy smear in  
398 the 40 to 100 kDa interval. Western blot analysis on a 20S (CP) purified from an  
399 equivalent enriched proteasome fraction (P3, Fig. 1) by ion exchange chromatography  
400 and size exclusion fractionation (Supplemental Fig. 1), suggests that the subunits of the  
401 20S are heavily ubiquitinated even though the proteasome fraction was purified from *A.*



402 *thaliana* cells kept under the optimal culture conditions (Fig. 2e and f). By Ponceau S  
403 staining (or Coomassie staining on an equivalent gel) the characteristic 20S (CP) set of  
404 bands were hard to observe in those fractions that potentially contained proteasomes  
405 with a molecular mass higher than the independent 20S (CP) (lanes 1 to 4, Fig. 2d).  
406 Nevertheless, the anti-20S antibody tracked proteasomes up to lanes 2, 3 and 4 (Fig. 2e  
407 and f) that correspond to putative proteasome complexes of a nominal average  
408 molecular mass (estimated by BN/PAGE) of approximately 1600, 1100 and 850 kDa,  
409 respectively. The proteasomes profile described in Fig. 2 was considered as the basal for  
410 *A. thaliana* suspension cells under optimum culture conditions as defined in this paper,  
411 where the predominant population of proteasomes was constituted by the independent  
412 20S (CP) and the abundance of “heavier” proteasomes gradually decreased toward the  
413 top of the BN/PAGE (Fig. 2e and f).

414

### 415 **3.3 High molecular mass proteasomes in heat-stressed cells**

416

417 Same general methodology (proteasome isolation, separation of different proteasome  
418 versions by BN/PAGE, electroelution/concentration and western blot) was applied to *A.*  
419 *thaliana* cells exposed to heat stress to detect possible alterations in the basal  
420 proteasomes arrangement observed in control cells (Fig. 2). First, we needed to establish  
421 if the content of total 20S proteasomes changed at 37 °C exposition. Densitometry  
422 analysis of the western blot films showed a small increment in the anti-20S antibody  
423 signal from 11 to 17% between unexposed cells and those at 37 °C and less of an 8%  
424 among stressed cells (Supplementary Fig. 2a to c). Since 20S content among samples  
425 were considered equivalent, for comparative purposes the BN/PAGE of proteasome-  
426 enriched fraction (P3) prepared from all culture cells were loaded with the same protein

427 content (Fig. 3). After 30 min of heat treatment, a major difference was detected on  
428 fraction 1 (Lane 1, Fig. 3c). A faint signal produced by a proteasome population of a  
429 presumed molecular mass of ~ 2 600 kDa (based on its BN/PAGE mobility) was  
430 detected. The signal from the proteasomes versions contained in fractions 2 to 4 was  
431 equivalent to the unexposed cells (lanes 2 to 4 Fig. 3a and c). We also noticed the  
432 presence of signal bands between 50 to 100 kDa (lane 5 Fig. 3c) that probably  
433 correspond to ubiquitinated subunits of the 20S proteasome (Supplementary Fig. 1b).  
434 Parallel determinations were also carried out to establish the global levels of protein  
435 ubiquitination and carbonylation of total cell lysates (Fig. 4). Both parameters have  
436 been broadly used as markers of cellular stress (Lledías et al., 1999; Taylor et al., 2002;  
437 Bollineni et al., 2014). At 30 min of heat treatment we detected the removal of 10% of  
438 the original total ubiquitin conjugates content by slot blot analysis (Fig. 4a) and a slight  
439 ubiquitination signal clearance in the western blot image (lane 2, Supplementary Fig.  
440 2d). The level of oxidatively modified proteins on the other hand, showed no changes at  
441 this time (Fig. 4b). The trypan blue cell viability assay showed no difference between  
442 the control and heat stressed cells. Trypan blue exclusion in stressed cells was  
443 equivalent to control culture even after 3 h recovery at 25 °C. A striking difference in  
444 the western blot proteasomes profile was detected at 1 and 2 h after the temperature  
445 increase, where an important enrichment of the higher order proteasome configurations  
446 was observed (lanes 1 to 4, Fig. 3d and e). In addition, a “new” anti-20S signal was  
447 detected in the fraction 6 from these heat-stressed cells cultures (lane 6 Fig. 3d and e)  
448 originated from a native protein complex of approximately 640 kDa. This molecular  
449 mass was significantly smaller than a functional 20S (CP). We speculated that in this  
450 fraction, because of the reactivity with the anti-20S (lane 6, Fig. 3 d to f), the estimated  
451 native molecular mass by BN/PAGE and the 20S peptides ( $\alpha$  and  $\beta$ ) obtained by mass

452 spectrometry (not shown), 20S assembly intermediate complexes known as  
453 half-proteasomes (13 -16S) could be localized ( Schmidtke et al., 1997; Lehmann et al.,  
454 2002). The 50 -100 kDa smear of the 20S (CP) subunits was equivalent at both times  
455 (lane 5, Fig. 3d and e) suggesting a strong 20S (CP) subunits ubiquitination. The  
456 increment in high molecular mass proteasome populations correlated with the clearance  
457 of 60% (at 1h) and 75% (at 2h) of the basal ubiquitinated proteins levels (Fig. 4a and  
458 Supplementary Fig. 2d). The total amount of protein carbonyls was practically unaltered  
459 at these times (Fig. 4b). Cell viability test showed no changes with respect to control  
460 cultures when determined immediately after 37 °C treatment or the recovery for 3 h at  
461 25 °C was allowed. The western blot analysis of cell suspension cultures at 3 h under  
462 heat stress, showed the higher enrichment of all the proteasome versions for all the  
463 times sampled, half-proteasomes included (Fig. 3 f). In addition, a noteworthy feature of  
464 this 3 h profile was the presence of 20S-immunoreactive bands between 60 and 70 kDa  
465 in all fractions (bracket in Fig. 3f, lanes 1 to 8). These bands are presumably produced  
466 by the ubiquitinated subunits of the 20S (CP) (Supplemental Fig. 1) that assembled the  
467 half-proteasomes, the free 20S CP and the higher molecular mass proteasome versions  
468 promoted by heat stress. There were also clear differences in the slot blot determination  
469 of total ubiquitin conjugates and carbonyl contents, a two-fold and a nine-fold increase  
470 respectively in comparison with the previous sampled hour (Fig. 4a and b). No changes  
471 in cell viability were observed relative to control cultures at 3h heating or after the  
472 recovery period.

473

474 **3.3 19S regulatory particle subunits are part of the high molecular mass**  
475 **proteasomes.**

476

477           The modular nature of proteasomes and their association/dissociation dynamics  
478 directed by environmental clues has been reported (Bajorek et al., 2003; Grune et al.,  
479 2011; Livnat-Levanon et al., 2014). High molecular mass proteasomes resolved by  
480 BN/PAGE were result from the assembly of different regulators on the distal surface of  
481 one or both the 20S  $\alpha$  rings (Shibatani et al., 2006). To determine if the high molecular  
482 mass proteasomes we observed contained 19S regulatory particle subunits, we probed  
483 the eight fractions obtained from a control culture BN/PAGE with antibodies against  
484 Rpn1 (19S base subunit), Rpt2 (19S base subunit), Rpn10 (19S lid subunit that keeps  
485 together base and lid) and Rpn6 (lid subunit which holds together 20S and 19S  
486 complexes). Fraction 5 that contained exclusively the independent 20S (CP) (lane 5,  
487 figure 5b and c) showed minimum or null reactivity against all the anti-19S regulatory  
488 subunits antibodies (lane 5, Fig. 5d to g). A strong signal with the immediate higher  
489 molecular mass proteasome complex was obtained with the Rpn10 and Rpn1 antibodies  
490 (Lane 4, Fig. 5d and e). Rpn10 signal showed a stepwise decrease toward the upper  
491 region of the BN/PAGE (Lanes 1 to 5, Fig. 5d) while the Rpn1 signal kept constant in  
492 three consecutive fractions and showed a decrease up to fraction 1 (Lanes 2 to 4, Fig.  
493 5e). The use of the Rpt2 and Rpn6 antibodies shown a very different pattern, a stepwise  
494 increase toward those fractions obtained from the top of the BN/PAGE. If we consider  
495 that, all the subunits are found in the context of their respective 20S or 19S complex  
496 (Livneh et al, 2016), our results suggest that some of the detected complexes probably  
497 represent 26S maturation/assembly intermediates. Based on the BN/PAGE mobility of  
498 the complex and the relative reactivity of the antibodies in each fraction, Rpn10 and  
499 Rpn1 were associated with the 20S CP (figure 5d and e, lanes 3 and 4) before  
500 association of Rpt2 and Rpn6 (Fig. 5f and g, lanes 3 and 4) as has been described  
501 (Hendil et al., 2009). In this context BN/PAGE fractions (Lanes 3 and 4, Figure 5)

502 could be considered early steps in the way to consolidate the higher molecular mass  
503 proteasome complexes 20S/19S and 19S/20S/19S probably contained in fractions 2 and  
504 1 respectively (Lane 2 and 1, Fig. 5).

505

#### 506 **4. Discussion**

507

508 Different proteasomes versions have been shown by BN/PAGE analysis of  
509 samples from a human embryonic cell line (HEK293) (Camacho-Carvajal et al., 2004)  
510 and rabbit reticulocytes [34] (Shibatani et al., 2006). The separation of the different  
511 proteasomes versions by BN/PAGE revealed that stimulation with  $\gamma$ -interferon or  
512 MG132 (a proteasome inhibitor) directed a dynamic process of recruitment and  
513 exchange of proteasome regulatory complexes (Shibatani et al., 2006). We reasoned  
514 that the published protocols of proteasomes isolation and electrophoretic analysis could  
515 be applicable to *A. thaliana* suspension cells, and as a starting point, to detect whether  
516 different proteasome versions are present in plants. We also would be able to analyze  
517 the proteasome populations changes in response to an insult such as temperature  
518 increment. In our hands, the published protocol for proteasome isolation (Shibatani et  
519 al., 2006) with some modifications was effective for *A. thaliana* cells in suspension  
520 cultures (Fig. 1b). In our lab, the same technique was useful for the isolation of  
521 proteasomes (and their BN/PAGE analysis) from *A. thaliana* two-week seedlings,  
522 mature spinach and maize leaves, different succulent plants leaves and from yeast,  
523 mouse liver, zebra fish and human erythrocytes (Rivas and Lledías, unpublished).  
524 When the enriched proteasome fraction (P3) of *A. thaliana* cells was separated by  
525 BN/PAGE and transferred to membranes for western blot detection with an anti-20S  
526 antibody, only one band was detected (Fig. 2a). Higher molecular mass complexes were

527 not observed at this point. We discarded the possibility that in our adaptation of the  
528 isolation protocol, any of the buffers or additives employed or even the sample freezing,  
529 promoted the disassembly of complex proteasomes. The same enrichment protocol has  
530 been successfully used as a previous step to purify, by ionic exchange chromatography  
531 and size exclusion fractionation, the 26S proteasomes from *A. thaliana* suspension  
532 culture cells. An alternative possibility was that the abundance of higher order  
533 proteasomes was relatively scarce in this cell type and were beyond the limit of  
534 detection. The electroelution protocol was effective for concentrating the proteasomes  
535 in all BN/PAGE fractions and facilitate their visualization by western blot (Fig. 2 and  
536 3). Four proteasome populations were revealed in suspension cells grown at optimum  
537 culture conditions (25 °C). The most abundant proteasome version corresponded to the  
538 independent 20S (CP) (Fig. 2 e and f). The identity of the 20S (CP) was verified by  
539 mass spectrometric analysis (Supplementary Table 1). We discarded the possibility that  
540 “heavier” proteasomes versions detected in unexposed or in heat stressed cells (Fig. 3)  
541 were product of an artifact caused by anomalous or not optimum electrophoretic  
542 separation of independent 20S (CP) particles, since fractions 1 to 6 (Fig. 3) electroeluted  
543 under native conditions and independently re-separated on fresh blue native gels, were  
544 detected at exactly the same original fractions. Even though samples were frozen at -70  
545 °C after their electroelution, high molecular mass complexes, the independent 20S (CP)  
546 and lower complexes preserved their original electrophoretic mobility. We observed  
547 that in cells, even at optimum growth conditions, the subunits of the 20S (CP) were  
548 probably ubiquitinated (Supplemental Fig. 1 and smear in lane 5 Fig. 3b). The  
549 posttranscriptional modification of the 20S (CP) subunits by ubiquitination have been  
550 shown by proteomic techniques in *A. thaliana* (Book et al., 2010). High temperatures by  
551 themselves caused intracellular protein denaturation and substrates ubiquitination

552 (Lepock et al., 1988; Pinto et al., 1991). In *A. thaliana* suspension cell cultures, a  
553 moderate heat stress was detected when the temperature was raised at 37 °C and the  
554 production of reactive oxygen species (ROS) was enhanced (Volkov et al., 2006) that in  
555 turn may promote protein carbonylation. A classical marker of cellular oxidative stress  
556 is the increase of carbonyls in total protein samples (Levine et al., 1990; Wong et al.,  
557 2010; Bollineni et al., 2014). Oxidation partially denatures protein and hydrophobic  
558 patches exposure initializes the intricate action of the ubiquitin-proteasome system  
559 (UPS) (Pacifci et al., 1993; Murata et al., 2001). Protein ubiquitin conjugates are  
560 considered an early and sensitive cell stress marker (Shang and Taylor 2011). In our  
561 experiments, the levels of ubiquitin conjugates and oxidatively modified proteins  
562 suggest two phases in the *A. thaliana* cell response to the heat increment. During the  
563 first phase (30 min to 2 h at 37 °C) 75 % the basal ubiquitin conjugates were removed  
564 (Fig. 4a and Supplementary Fig. 2d) while the total protein carbonyl level remained  
565 relatively unaltered (Fig. 4b). These results indicate that an oxidative stress was not  
566 produced because the antioxidant machinery and the modified protein elimination  
567 mechanisms (ub-conjugates degradation among them) were effective. The western blot  
568 proteasome profiles (Fig. 3a to e) suggest that heat increment promoted the assembly of  
569 proteasome versions of a molecular mass higher than the free 20S (CP). In reticulocytes  
570 the differences in molecular mass of proteasomes complexes detected by BN/PAGE  
571 have been attributed to the interaction of the 20S (CP) with the 19S particle to constitute  
572 the 26S proteasome (Shibatani et al., 2006; Camacho-Carvajal et al., 2004) which in  
573 turn is responsible of ubiquitin conjugates elimination (Smalle and Vierstra, 2004;  
574 Voges et al., 1999) while the still independent 20S (CP) degrades oxidatively modified  
575 proteins (Ferrington et al., 2001; Grune et al., 1997). In *A. thaliana*, the abundance of  
576 these two proteasome entities is highly interrelated during cell growth and stress

577 tolerance (Kurepa et al., 2009). If the degradation of protein ubiquitin conjugates was  
578 limited (by 26S synthesis impairment) the degradation of oxidized proteins by the  
579 independent 20S (CP) was favored (Kurepa et al., 2008). We consider that the opposite  
580 phenomenon as we observe during the first phase is also plausible. During the second  
581 phase (3 h at 37 °C) both stress markers increased, doubled for ubiquitin conjugates and  
582 a nine-fold increase was detected for protein oxidation (Fig. 4a and b). These results are  
583 indicative that cellular antioxidant and damaged protein removal capacities were  
584 surpassed, and an oxidative stress episode was initiated (Sies, 1997). The western blot  
585 profile showed the higher enrichment for all the proteasomes versions observed (Fig. 3  
586 f). The stress markers levels and the western blot results combined, suggest that high  
587 molecular mass proteasomes still removed ubiquitin conjugates but with a relative  
588 diminished efficiency (Fig. 4a); however, oxidized proteins greatly increased (Fig.4b).  
589 We hypothesize that high temperature for 3 h, forced the cell machinery to assembly  
590 high molecular mass proteasomes while decreasing the total amount of independent 20S  
591 (CP), oxidatively modified proteins increased consequently. The 26S proteasome has  
592 been shown inefficient at degrading oxidatively modified proteins (Davies, 2001) and in  
593 addition, was inhibited by oxidative stress (Reinheckel et al., 1998). This observation  
594 probably explains why despite “heavier” proteasomes were enriched at this time (Fig.  
595 3f) a decrease of 50% in their capability of ubiquitinated proteins removal was detected  
596 (Fig. 4a). An additional explanation for the impaired oxidized protein elimination is the  
597 sensitivity of the trypsin and caspase-like 20S (CP) catalytic activities to oxidation  
598 (Demasi et al., 2003). A heavy signal, attributable to 20S subunits ubiquitination was  
599 observed for all the BN/PAGE fractions from suspension cells heat stressed for 3h (Fig.  
600 3f and Supplemental Fig. 1). Under abiotic stress, the activity of specific *A. thaliana*  
601 ubiquitin ligases (Pub22 and Pub23) increased, which destabilized the 19S regulator by



602 ubiquitination of its subunits (Cho et al., 2015). In human embryonic cells (HEK293)  
603 the ubiquitination of the subunit Rpn13 (a ubiquitinated proteins receptors located in the  
604 regulatory particle 19S) decreased its substrate binding capacities under proteotoxic  
605 stress conditions leading to ubiquitin conjugates build up (Besche et al., 20014).  
606 Inhibition of the 26S activity by substrate overload is plausible (Kurepa et al., 2009).  
607 All these processes are probably happening in cells in suspension cultures throughout 3  
608 h of heat exposition.  
609 Severe heat stress causes an increase in ubiquitinated proteins (Ferguson et al., 1994)  
610 and the accumulation of protein carbonyls has been reported as a product of heat  
611 exposition in plants that produced an excess in ROS production (Hasanuzzaman et al.,  
612 20013). In our experiments, the elimination of ubiquitin conjugates and the avoidance  
613 of the accumulation of protein oxidation products during the first 2 h of heat exposition  
614 suggest that *A. thaliana* suspension cell cultures adapted the proteasome degradative  
615 machinery (and additional cellular mechanisms) to tolerate the temperature increment, a  
616 tolerance that seemed limited to the third hour where the cell stress markers increased  
617 (Fig 4a and b). Despite this fact, cell viability values remain unaltered for 3 h, a  
618 parameter that indicated that at least for this period, the cell capacity to cope with heat  
619 stress was not entirely compromised.  
620 The films in Fig. 3 (a, c to f) were exposed the same time to the chemiluminescence  
621 developing reaction to allow a direct comparison among the different proteasome  
622 populations present at different times under stress. The contrast between the proteasome  
623 complement of control cells with those of the stressed cultures (Fig. 3), even when a  
624 longer film exposure was practiced for control cells (Fig. 3b), strongly suggests that  
625 heat stress promoted the assembly of proteasome versions with a molecular mass higher  
626 than the independent 20S (CP). Our western blot analysis of total lysates showed that

627 there was not a significant net increase in the total content of proteasomes 20S (CP)  
628 subunits among the heat-treated cells (Supplemental Fig. 2). However, the profiles  
629 obtained by the separation of different proteasomes populations by BN/PAGE (Fig. 3)  
630 and 20S ubiquitination (Supplementary Fig. 1), suggest that synthesis, assembly and  
631 probably degradation of proteasomes subunits were promoted under heat stress. During  
632 this very dynamic process, proteasomes subunits could be synthesized and assembled as  
633 half-proteasomes through their activation as mature 20S (CP). Eukaryotic  
634 half-proteasomes are assembly complexes constituted by a seven-membered  $\alpha$  ring and  
635 several  $\beta$  subunits proproteins (Schmidtke et al., 1997; Lehmann et al., 2002 and  
636 dedicated chaperones (Le Tallec et al., 2007). In line with our observation, mammalian  
637 half-proteasomes were localized just above the band of mature 20S (CP) by native gel  
638 electrophoresis (Schmidtke et al., 1997). Once 20S (CP) are completed, they are  
639 available as platforms to assembly higher molecular mass proteasomes versions, or they  
640 can remain independent, in close dependence with the protein turn over needs imposed  
641 by the environment. The western blot analysis of the BN/PAGE fractions 1 to 8 from  
642 control cells, showed that the 19S regulatory particle subunits Rpn10, Rpn1, Rpt2 and  
643 Rpn6 are associated to “supra” 20S proteasome assemblies (Fig. 5). The use of  
644 antibodies against the 19S regulatory particle subunits Rpn10, Rpn1 and Rpt2 produced  
645 a faint signal associated with the independent 20S and the putative semi-proteasome  
646 (Fig. 5, lanes 5 and 6 respectively). Signals from non-20S associated forms were  
647 detected in fractions 7 and 8 (Fig. 5d to g). We propose that some of the observed heat-  
648 enriched proteasome versions, corresponded to the 26S assembly and other alternative  
649 proteasome versions with ub-conjugates elimination capacities, while the isolated 20S  
650 (CP) kept oxidatively modified proteins at basal levels. We cannot discard the  
651 possibility that even other high molecular mass proteasome forms were also involved in

652 the ubiquitin conjugates and oxidized proteins elimination. Experimental evidenced  
653 have shown that during an oxidative stress event in yeast, Ecm29 increased its  
654 association with the 19S regulatory complex promoting 26S disassembly. Since  
655 independent 20S (CP) population increased oxidized modified proteins could be  
656 preferentially degraded (Wang et al., 2010). In murine fibroblasts, proteasomes with an  
657 array PA28-20S-PA28 induced during oxidative stress, degraded carbonylated proteins  
658 with a higher efficiency (Pickering et al., 2010).

659 The presence in the cell of *ad hoc* proteasomes could offer better possibilities for  
660 successfully coping with unfavorable growth conditions. Additional and higher  
661 resolution analyses are needed to identify the specific protein components in each  
662 fraction in the Ub-proteasome pathway context, nevertheless we consider that our  
663 approach of proteasome isolation by centrifugation, separation of discrete proteasomes  
664 populations based in their molecular mass differences by BN/PAGE, and the  
665 concentration of the samples by electroelution shown that an increment in culture  
666 temperature directed the assembly of “supra” 20S proteasome complexes. Our protocol  
667 (combined with mass spectrometry and western blot) could be considered a useful tool  
668 to characterize the regulators and the additional interacting proteins that contribute to  
669 the proteasomes function and dynamics.

670

## 671 **Contribution**

672

673 Daniel Aristizábal: performed the experiments and analyzed the data. Viridiana Rivas:  
674 performed some of the experiments. Fernando Lledías: conceived and designed the  
675 experiments, performed some of the experiments and wrote the manuscript. Gladys  
676 Cassab: wrote the manuscript.

677

678 **Acknowledgments**

679 We are thankful to P. Guzmán and L. Aguilar (CINVESTAV, Irapuato) for providing  
680 the *A. thaliana* suspension cell cultures. We also thank Unidad de Proteómica, Instituto  
681 de Biotecnología, Universidad Nacional Autónoma de México for the mass  
682 spectrometry analysis.

683

684 **Conflicts of interest**

685 The authors declare that they have no conflicts of interest.

686

687 **Ethical approval**

688 This article does not contain any studies with human participants or animals performed  
689 by any of the authors.

690

691 **Funding**

692 This work was supported by a research grant from PAPIIT/DGAPA/UNAM IN212116  
693 (F Lledías).

## REFERENCES

- Bajorek M, Finley D, Glickman MH.** 2003. Proteasome disassembly and downregulation is correlated with viability during stationary phase. *Current Biology* **13**, 1140–1144
- Beck F, Unverdorben P, Bohn S, Schweitzer A, Pfeifer G, Sakata E, Nickell S, Plitzko JM, Villa E, Baumeister W, Forster F.** 2012. Near-atomic resolution structural model of the yeast 26S proteasome. *Proceedings of the National Academy of Sciences* **109**, 14870-14875
- Besche HC, Sha Z, Kukushkin NV, Peth A, Hock EM, Woong , Gygi S, Gutierrez JA, Liao H, Dick L, Goldberg AL.** 2014. Autoubiquitination of the 26S Proteasome on Rpn13 Regulates Breakdown of Ubiquitin Conjugates. *EMBO Journal* **33**, 1159-1176
- Blickwedehl J, Olejniczak S, Cummings R, Sarvaiya N, Mantilla A, Chanan-Khan A, Pandita TK, Schmidt M, Thompson CB, Bangia N.** 2012. The proteasome activator PA200 regulates tumor cell responsiveness to glutamine and resistance to ionizing radiation. *Molecular Cancer Research* **10**, 937-944
- Blum H, Beier H, Gross HJ.** 1986. Improved silver staining of plant proteins, RNA and DNA in polyacrylamide gels. *Electrophoresis* **8**, 93-99
- Bohn S, Beck F, Sakata E, Walzthoeni T, Beck M, Aebersold R, Förster F, Baumeister W, Nickell S.** 2010. Structure of the 26S proteasome from *Schizosaccharomyces pombe* at subnanometer resolution. *Proceedings of National Academy of Sciences* **107**, 20992-20997

- Bollineni RC, Hoffmann R, Fedorova M.** 2014. Proteome-wide profiling of carbonylated proteins and carbonylation sites in HeLa cells under mild oxidative stress conditions. *Free Radical Biology and Medicine* **68**, 186-95
- Book AJ, Gladman NP, Lee SS, Scalf M, Smith LM, Vierstra RD.** 2010. Affinity purification of the Arabidopsis 26S proteasome reveals a diverse array of plant proteolytic complexes *Journal of Biological Chemistry* **285**, 25554-25569
- Camacho-Carvajal MM, Wollscheid B, Aebersold R, Steimle V, Schamel WW.** 2004. Two-dimensional Blue native/SDS gel electrophoresis of multi-protein complexes from whole cellular lysates: a proteomics approach. *Molecular and Cellular Proteomics* **3**, 176-182.
- Cho SK, Bae H, Ryu MY, Wook Yang S, Kim WT.** 2015. PUB22 and PUB23 U-BOX E3 ligases directly ubiquitinate RPN6, a 26S proteasome lid subunit, for subsequent degradation in Arabidopsis thaliana *Biochemical and Biophysical Research Communication* **464**, 994-999
- Couttas T, Raftery M, Erce M, Wilkins M.** 2011. Monitoring cytoplasmic protein complexes with blue native gel electrophoresis and stable isotope labelling with amino acids in cell culture: analysis of changes in the 20S proteasome. *Electrophoresis* **32**, 1819-1823.
- Davies KJ.** 2001. Degradation of oxidized proteins by the 20S proteasome. *Biochimie* **83**, 301-10.
- Demasi M, Silva GM, Netto LE.** 2003. 20S proteasome from *Saccharomyces cerevisiae* is responsive to redox modifications and is S-glutathionylated. *Journal of Biological Chemistry* **278**, 679-685
- Ferguson IB, Lurie S, Bowen JH.** 1994. Protein synthesis and breakdown during heat shock of cultured pear (*Pyrus communis*) cells. *Plant Physiology* **104**, 1429-1437

- Fort P, Andrey V, Kajava AV, Delsuc F, Coux O.** 2015. Evolution of Proteasome Regulators in Eukaryotes. *Genome Biology and Evolution* **7**, 1363-1379.
- Ferrington DA, Sun H, Murray KK, Costa J, Williams TD, Bigelow DJ, Squier TC.** 2001. Selective degradation of oxidized calmodulin by the 20 S proteasome. *Journal of Biological Chemistry* **276**, 937-943
- Glickman MH, Ciechanover A.** 2002. The ubiquitin-proteasome proteolytic pathway: Destruction for the sake of construction. *Physiological Reviews* **82**, 373-428
- Groll, M. Bajorek M, Köhler Moroder L, Rubin DM Huber R, Glickman MH, Finley D.** 2000. A gated channel into the proteasome core particle. *Nature Structural Biology* **7**, 1062-1067
- Grune T, Reinheckel T, Davies KJ.** (1997) Degradation of oxidized proteins in mammalian cells. *FASEB Journal* **11**, 526-534
- Grune T, Catalgol B, Licht A, Ermak G, Pickering AM, Ngo JK, Davies KJ.** 2011. HSP70 mediates dissociation and reassociation of the 26S proteasome during adaptation to oxidative stress. *Free Radicals Biology and Medicine* **51**, 1355-64
- Hasanuzzaman M, Nahar K, Alam MM, Roychowdhury R, Masayuki Fujita M.** 2013. Physiological, biochemical, and molecular mechanisms of heat stress tolerance in plants. *International Journal of Molecular Sciences* **14**, 9643-9684
- Hashemi A, Gharechahi J, Nematzadeh G, Shekari F, Hosseini SA, Salekdeh GH** 2016. Two-dimensional blue native/SDS-PAGE analysis of whole cell lysate protein complexes of rice in response to salt stress. *Journal of Plant Physiology* **200**, 90-101
- Hendil KB, Kriegenburg F, Tanaka K, Murata S, Lauridsen AB, Johnsen AH, Hartmann-Petersen R** 2009. The 20S proteasome as an assembly platform for the 19S regulatory complex. *Journal of Molecular Biology* **394**, 320-328

- Hernebring M, Fredriksson Å, Liljevald M, Cvijovic M, Norman K, Wiseman J, Semb H, Nyström T.** 2013. Removal of damaged proteins during ES cell fate specification requires the proteasome activator PA28. *Scientific Reports* **3**, 1-6
- Hershko A, Ciechanover A.** 1998. The ubiquitin system. *Annual Review of Biochemistry* **67**, 425-79
- Johansson E, Olsson O, Nystrom T.** 2004. Progression and specificity of protein oxidation in the life cycle of *Arabidopsis thaliana*. *Journal of Biological Chemistry* **279**, 22204-22208.
- Kish-Trier E, Hill CP.** 2013. Structural biology of the proteasome. *Annual Review of Biophysics* **42**, 29-49
- Kurepa J, Toh-e A, Smalle JA.** 2008. 26S proteasome regulatory particle mutants have increased oxidative stress tolerance. *Plant Journal* **53**, 102-114
- Kurepa J, Wang S, Li Y, Smalle J.** 2009. Proteasome regulation, plant growth and stress tolerance. *Plant Signaling and Behavior* **4**, 924-927
- Laemmli UK.** 1970. Cleavage of Structural Proteins during the Assembly of the Head of Bacteriophage. *Nature* **227**, 680-685
- Lasserre JP, Beyne E, Pyndiah S, Lapaillerie D, Claverol S, Bonneu M.** 2006. A complexomic study of *Escherichia coli* using two-dimensional blue native/SDS polyacrylamide gel electrophoresis. *Electrophoresis* **27**, 3306-21
- Le Tallec B, Barrault MB, Courbeyrette R, Guérois R, Marsolier-Kergoat MC, Peyroche A.** 2007. 20S proteasome assembly is orchestrated by two distinct pairs of chaperones in yeast and in mammals. *Molecular Cell* **27**, 660-674
- Lehmann A, Janek K, Braun B, Kloetzel PM, Enenkel C.** 2002. 20S proteasomes are imported as precursor complexes into the nucleus of yeast. *Journal of Molecular Biology* **317**, 401-413



- Lehmann A, Niewianda A, Jechow K, Janek K, Enenkel C.** 2010. Ecm29 fulfills quality control functions in proteasome assembly. *Molecular Cell* **38**, 879-888
- Lepock JR, Frey HE, Rodahl AM, Kruuv J.** 1988. Thermal analysis of CHL V79 cells using differential scanning calorimetry: implications for hyperthermic cell killing and the heat shock response. *Journal of Cellular Physiology* **137**, 14-24
- Levine RL, Garland D, Oliver CN, Amici A, Climent I, Lenz AG, Ahn BW, Shaltiel S, Stadtman E R.** 1990. Determination of carbonyl content in oxidatively modified proteins *Methods in Enzymology* **186**, 464-478
- Livneh I, Cohen-Kaplan V, Cohen-Rosenzweig C, Avni N, Ciechanover A.** 2016. The life cycle of the 26S proteasome: from birth, through regulation and function, and onto its death. *Cell Research* **26**, 869-885
- Livnat-Levanon N, Kevei E, Kleifeld O, Krutauz D, Segref A, Rinaldi T, Erpapazoglou Z, Cohen M, Reis N, Hoppe T.** 2014. Reversible 26S proteasome disassembly upon mitochondrial stress. *Cell Reports* **7**, 1371-1380
- Lledías F, Rangel P, Hansberg W.** 1999. Singlet oxygen is part of a hyperoxidant state generated during spore germination. *Free Radical Biology and Medicine* **26**, 1396-404
- Lowry OH, Rosebrough NJ, Farr AL, Randall RJ.** 1951. Protein measurement with the Folin phenol reagent. *Journal of Biological Chemistry* **193**, 265-275
- Makkar H, Sharma O, Negi S.** 1980. Assay of proteins by Lowry's method in the presence of high concentrations of beta-mercaptoethanol. *Analytical Biochemistry* **104**, 124-116
- Manzano C, Abraham Z, López-Torrejón G, Del Pozo JC.** 2008. Identification of ubiquitinated proteins in Arabidopsis. *Plant Molecular Biology* **68**, 145-58
- Murashige T, and Skoog F.** 1962. A revised medium for rapid growth and bioassays with tobacco tissue cultures. *Physiologia Plantarum* **15**, 473-497

- Murata S, Minami Y, Minami M, Chiba T, Tanaka K.** 2001. CHIP is a chaperone-dependent E3 ligase that ubiquitylates unfolded protein. *EMBO Reports* **2**, 1133-1138
- Nussbaum, AK Dick TP, Keilholz W, Schirle M, Stevanović S, Dietz K, Heinemeyer W, Groll M, Wolf DH, Huber R, Rammensee HG, Schild H.** 1998. Cleavage motifs of the yeast 20S proteasome  $\beta$  subunits deduced from digests of enolase 1. *Proceedings of the National Academy of Sciences* **95**,12504-12509
- Obin M, Shang F, Gong X, Handelman G, Blumberg J, Taylor A.** 1998. Redox regulation of ubiquitin-conjugating enzymes: mechanistic insights using the thiol-specific oxidant diamide. *FASEB Journal* **12**, 561-569
- Ohhashi T, Moritani C, Andoh H, Satoh S, Ohmori S, Lottspeich F, Ikeda M.** 1991. Preparative high-yield electroelution of proteins after separation by sodium dodecyl sulphate-polyacrylamide gel electrophoresis and its application to the analysis of amino acid sequences and to raise antibodies. *Journal of Chromatography* **585**, 153-159
- Pacifici RE, Kono Y, Davies J.** 1993. Hydrophobicity as the signal for selective degradation of hydroxyl radical-modified hemoglobin by the multicatalytic proteinase complex, proteasome. *Journal of Biological Chemistry* **268**, 15405-15411
- Pickering AM, Koop AL, Teoh CY, Ermak G, Grune T, Davies KJ.** 2010. The immunoproteasome, the 20S proteasome and the PA28 $\alpha\beta$  proteasome regulator are oxidative-stress-adaptive proteolytic complexes. *Biochemical Journal* **432**, 585-594
- Polge C, Jaquinod M, Holzer F, Bourguignon J, Walling L, Brouquisse R.** 2009. Evidence for the existence in *Arabidopsis thaliana* of the proteasome proteolytic pathway activation in response to cadmium. *Journal of Biological Chemistry* **284**, 35412-35424

- Peth A, Uchiki T, Goldberg AL.** 2010. ATP-dependent steps in the binding of ubiquitin conjugates to the 26S proteasome that commits to degradation. *Molecular Cell* **40**, 671-681
- Pinto M, Morange M, Bensaude O.** 1991. Denaturation of proteins during heat shock. In vivo recovery of solubility and activity of reporter enzymes. *Journal of Biological Chemistry* **266**, 13941-13946
- Reinheckel T, Sitte N, Ullrich O, Kuckelkorn U, Davies KJ, Grune T.** 1998. Comparative resistance of the 20S and 26S proteasome to oxidative stress. *Biochemical Journal* **335**, 637-642
- Sakata E, Bohn S, Mihalache O, Kiss P, Beck F, Nagy I, Nickell S, Tanaka K, Saeki Y, Forster F, Baumeister W.** 2012. Localization of the proteasomal ubiquitin receptors Rpn10 and Rpn13 by electron cryomicroscopy. *Proceedings of National Academy of Sciences* **109**, 1479-1484
- Schmidtke G, Schmidt, Kloetzel PM.** 1997. Maturation of mammalian 20S proteasome: purification and characterization of 13S and 16S proteasome precursor complexes. *Journal of Molecular Biology* **268**, 95-106
- Schweitze A, Aufderheide A, Rudack T, Beck F, Pfeifer G, Plitzko JM, Sakata E, Schulten K, Forster F, Baumeister W.** 2016. Structure of the human 26S proteasome at a resolution of 3.9 Å. *Proceedings of National Academy of Sciences* **113**, 7816-7821
- Sessler N, Krug K, Nordheim A, Mordmuller B, Macek B.** 2012. Analysis of the *Plasmodium falciparum* proteasome using Blue Native PAGE and label-free quantitative mass spectrometry. *Amino Acids* **43**, 1119–1129
- Shang F, Taylor A.** 1995. Oxidative stress and recovery from oxidative stress are associated with altered ubiquitin-conjugating and proteolytic activities in bovine lens epithelial cells. *Biochemical Journal* **307**, 297-303

- Shang F, Taylor A.** 2011. Ubiquitin–proteasome pathway and cellular responses to oxidative stress. *Free Radical Biology and Medicine* **51**, 5-16
- Shibatani T, Carlson EJ, Larabee F, McCormack AL, Früh K, Skach WR.** 2006. Global organization and function of mammalian cytosolic proteasome pools: implications for PA28 and 19S regulatory complexes. *Molecular Biology of the Cell* **17**, 4962-4971
- Shibahara T, Kawasaki H, Hirano H.** 2002. Identification of the 19S regulatory particle subunits from the rice 26S proteasome. *European Journal of Biochemistry* **5**, 1474-83.
- Sies H.** 1997. Oxidative stress: oxidants and antioxidants. *Experimental Physiology* **82**, 291-295
- Smalle J, Vierstra RD.** 2004. The ubiquitin 26S proteasome proteolytic pathway. *Annual Review of Plant Physiology* **55**, 555–590
- Sui LM, Hughes W, Hoppe AJ, Petra PH.** 1996. Direct evidence for the localization of the steroid-binding site of the plasma sex steroid-binding protein (SBP or SHBG) at the interface between the subunits. *Protein Science* **5**, 2514-2520
- Tanaka K, Yoshimura T, Kumatori A, Ichihara A, Ikai A, Nishigai M, Kameyama K, Takagi T.** 1988. Proteasomes (multi-protease complexes) as 20S ring-shaped particles in a variety of eukaryotic cells *Journal of Biological Chemistry* **263**, 16209-16217
- Tang CH, Leu MY, Shao K, Hwang LY, Chang WB.** 2014. Short-term effects of thermal stress on the responses of branchial protein quality control and osmoregulation in a reef-associated fish, *Chromis viridis*. *Zoological Studies* **53**, 1-9.

- Taylor A, Shang FT, Nowell T, Galanty Y, Shiloh Y.** 2002. Ubiquitination capabilities in response to neocarzinostatin and H<sub>2</sub>O<sub>2</sub> stress in cell lines from patients with ataxia-telangiectasia. *Oncogene* **21**, 4363-4373
- Thompson AR, Vierstra RD.** 2005. Autophagic recycling: lessons from yeast help define the process in plants. *Current Opinion in Plant Biology* **8**, 165–173
- Volkov R, Panchuk I, Mullineaux P, Schoffl F.** 2006. Heat stress-induced H<sub>2</sub>O<sub>2</sub> is required for effective expression of heat shock genes in Arabidopsis. *Plant Molecular Biology* **61**, 733-746.
- Voges D, Zwickl P, Baumeister, W.** 1999. The 26S proteasome: a molecular machine designed for controlled proteolysis. *Annual Review of Biochemistry* **68**, 1015-1068
- Wang YJ, Kaiser P, Huang L.** 2010. Regulation of the 26S proteasome complex during oxidative stress. *Science Signaling* **3**, 1-10
- Wittig I, Braun HP, Schägger H.** 2006, Blue native PAGE. *Nature Protocols* **1**, 418-28
- Wittig I, Beckhaus T, Wumaier Z, Karas M, Schägge H.** 2010. Mass estimation of native proteins by blue native electrophoresis. Principles and practical hints. *Molecular and Cellular Proteomics* **9**, 2149-2161
- Wong CM, Marcocci L, Liu L, Suzuki YJ.** 2010. Cell signaling by protein carbonylation and decarbonylation. *Antioxidants and Redox Signaling* **12**, 393-404
- Yang P, Fu H, Walker J, Papa CM, Smalle J, Ju YM, Vierstra RD.** 2004. Purification of the Arabidopsis 26 S proteasome: biochemical and molecular analyses revealed the presence of multiple isoforms. *Journal of Biological Chemistry* **279**, 6401-6413

## FIGURES

### **Heat stress reveals high molecular mass proteasomes in *Arabidopsis thaliana* suspension cells cultures**

Daniel Aristizábal, Viridiana Rivas, Gladys Cassab and Fernando Lledías\*

Departamento de Biología Molecular de Plantas  
Instituto de Biotecnología, Universidad Nacional Autónoma de México  
Av. Universidad 2001, Col. Chamilpa, Cuernavaca, Mor., 62250, México.

\*Corresponding Author  
flledias@ibt.unam.mx

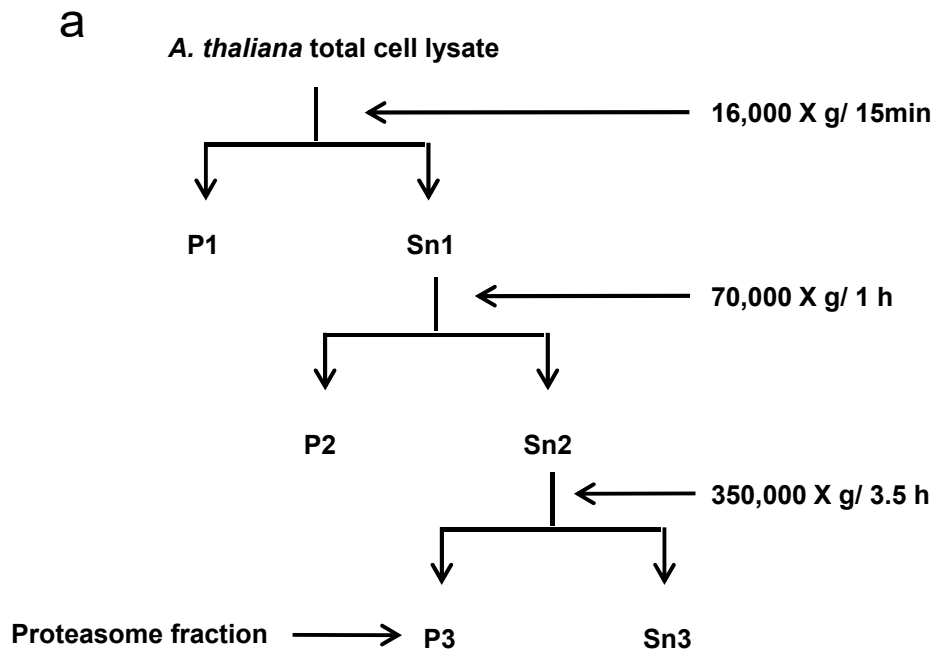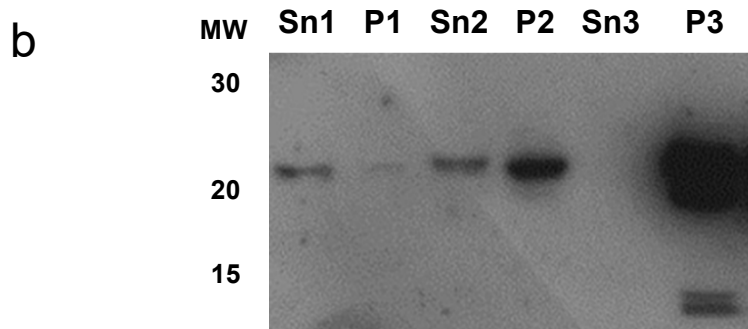

**Fig. 1**

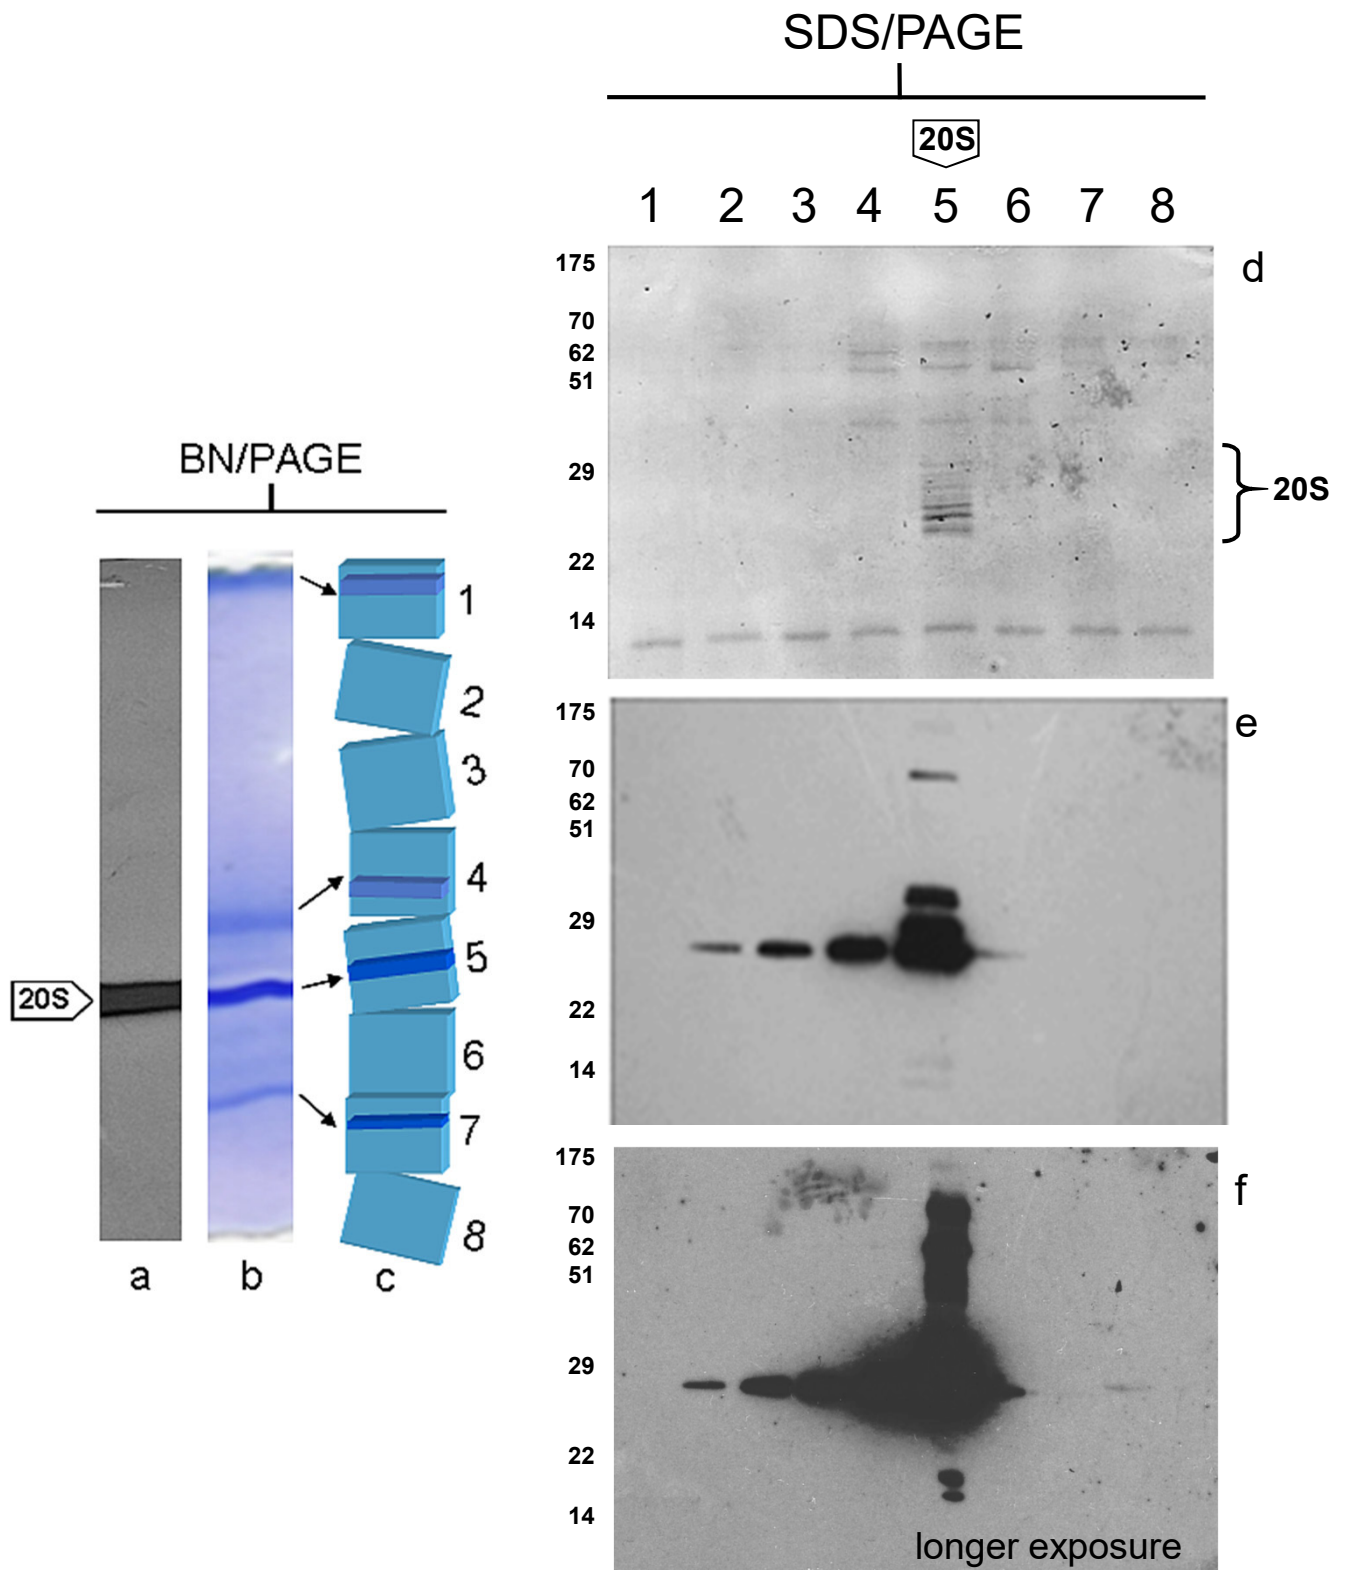

**Fig. 2**



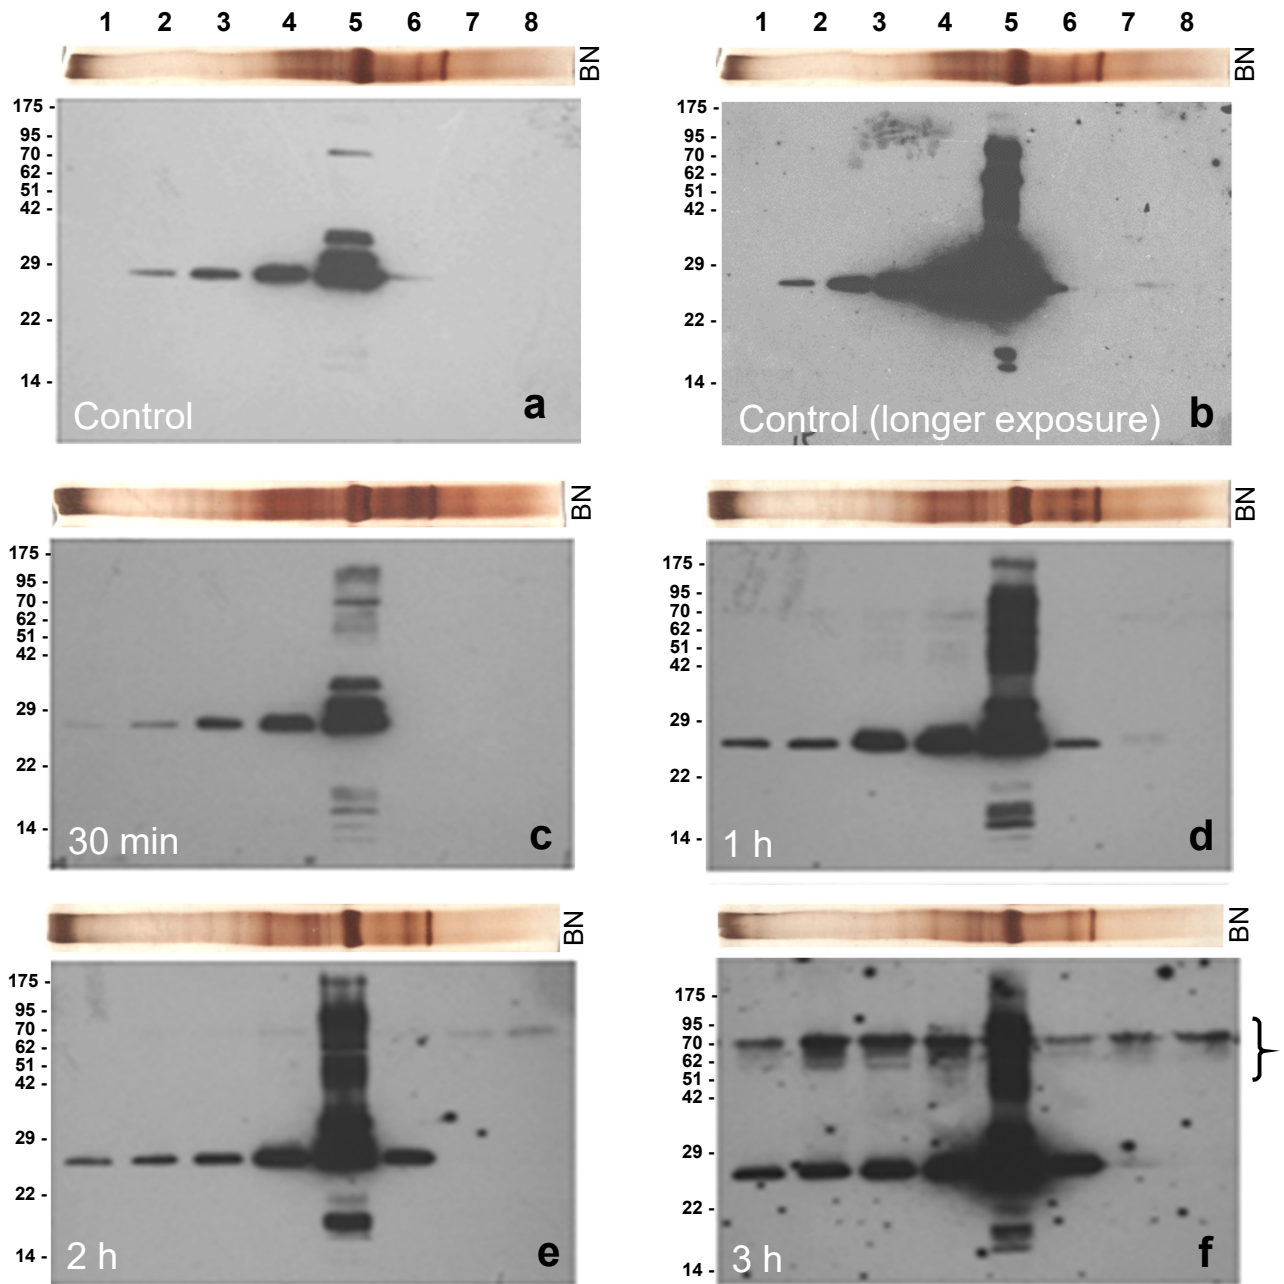

**Fig. 3**

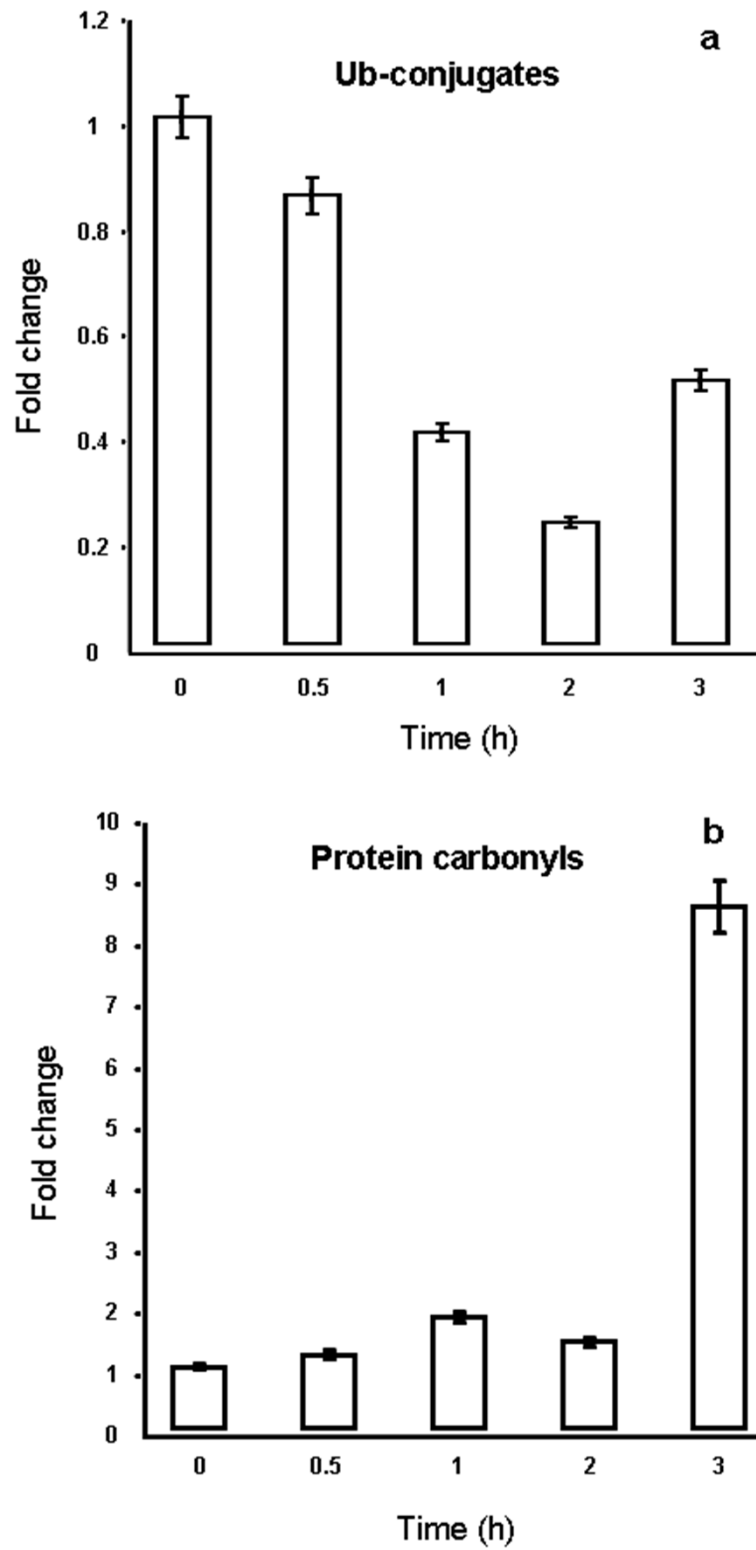

**Fig. 4**

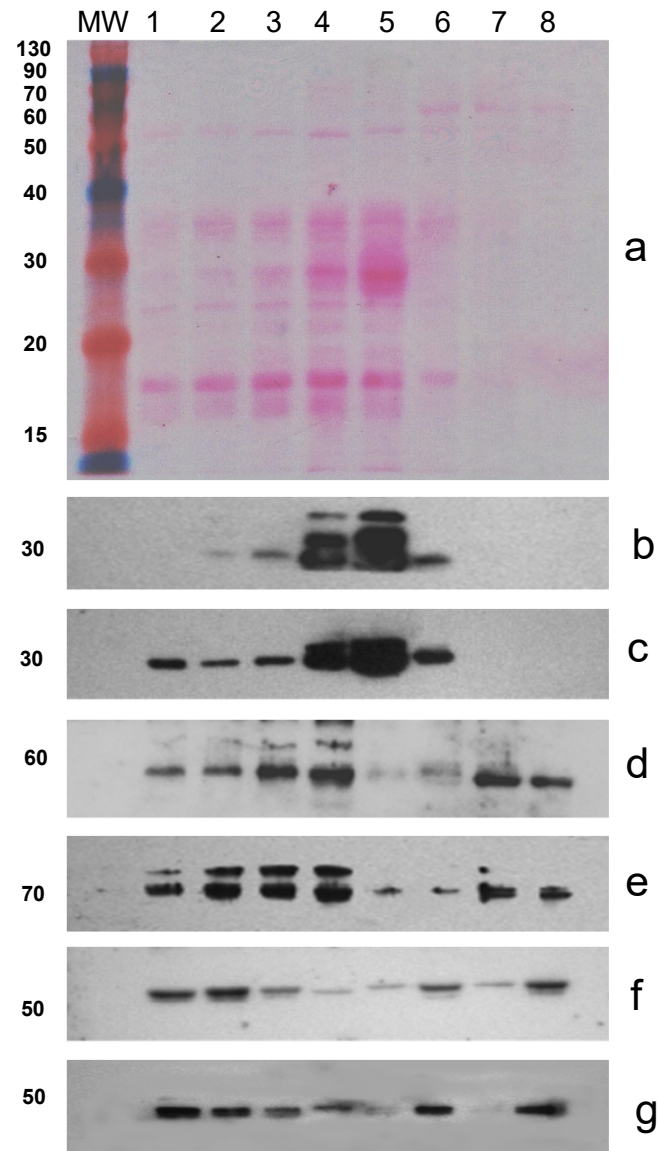

**Fig. 5**

## FIGURE LEGENDS

### **Heat stress reveals high molecular mass proteasomes in *Arabidopsis thaliana* suspension cells cultures**

Daniel Aristizábal, Viridiana Rivas, Gladys Cassab and Fernando Lledías\*

Departamento de Biología Molecular de Plantas

Instituto de Biotecnología, Universidad Nacional Autónoma de México

Av. Universidad 2001, Col. Chamilpa, Cuernavaca, Mor., 62250, México.

\*Corresponding Author

[flledias@ibt.unam.mx](mailto:flledias@ibt.unam.mx)

**Fig. 1. Proteasomes isolation scheme.** A proteasome enriched fraction was obtained by differential centrifugation from total lysates of *A. thaliana* cell suspension cultures (a). Representative aliquots of all the pellets (P1 to P3) and supernatants (Sn1 to Sn3) were separated by SDS/PAGE and analyzed by western blot using an anti-20S antibody to determine the protocol efficiency (b). The proteasome enriched fractions (P3) resuspended in buffer A were directly loaded onto BN/PAGE gels to separate the proteasomes based on their molecular mass differences.

**Fig. 2. Separation of the different proteasome versions of *A. thaliana* cells by BN/PAGE and analysis by western blot.** Proteasome enriched fraction (P3) was separated by BN/PAGE (b). In-gel denatured proteins were transferred to a nitrocellulose membrane to identify 20S (CP) subunits with an anti-20S antibody (a). To detect higher molecular mass proteasomes, a complete BN/PAGE gel was cut into eight fractions (1 to 8, c). Proteins contained in each fraction were electroeluted/concentrated to be analyzed independently by SDS/PAGE and western blot using an anti-20S antibody. Transferred proteins were stained with Ponceau S (d) before 20S (CP) detection by western blot (e and f).

**Fig. 3. Western blot proteasomes profiles of *A. thaliana* cells under heat stress.** Proteasome enriched fractions (P3) from cells cultures at 37°C were separated by BN/PAGE. Eight fractions obtained from each BN/PAGE gel (lanes 1 to 8) were individually electroeluted/concentrated, precipitated and analyzed by western blot using an anti-20S antibody. Panel a correspond to unexposed cells, c to e show the profiles of the cells recovered at 30 min, 1, 2 and 3 h, respectively. Except for b, all films were exposed the same time to the chemiluminescent developing reaction. Above to each

film image, we positioned a silver stained BN/PAGE lane (**BN**) to show the actual protein content and profile of each P3 sample from where the eight fractions were obtained. The most abundant protein in all BN/PAGE, electroeluted from fraction 5 (lane 5, a to f) was the independent 20S (CP). The signals from fractions 1 to 4 (**a** to **f**) were produced by proteasome versions with a molecular mass higher than the 20S (CP).

**Fig. 4. Ubiquitin conjugates and protein carbonyls of total lysates from *A. thaliana* cell cultures exposed to heat stress.** 5 mg of total protein extract were loaded into slot blot wells and immobilized in nitrocellulose membranes for the determination of the total amount of ubiquitin conjugates present in cells incubated at 37 °C for 0.5, 1, 2 and 3 h with a monoclonal anti-Ubiquitin antibody (**a**). Same protocol was followed to determine the content of oxidatively modified proteins, except samples were derivatized with DNPH before their membrane immobilization (**b**). Detection was made with an anti-DNPH antibody. Densitometry films values were normalized to 1, considering the ubiquitin conjugates or total carbonyl contents from an unexposed control (0 h). Media and standard deviations of three independent experiments are represented in the graphs.

**Fig. 5. 19S regulatory particle subunits were present in high molecular mass proteasomes.** Denatured BN/PAGE fractions (1-8) from control *A thaliana* cells were transferred to nitrocellulose, stained with Ponceau red (**a**) and probed with anti-20S (**b** and **c**), anti-Rpn 10 (**d**), anti-Rpn 1 (**e**), anti-Rpt 2 (**f**) and anti-Rpn 6 (**g**) antibodies. In contrast with panel (**b**), the anti-20S profile in **c**, was obtained with five times higher protein loading.
